# Supplementary material for: Roles played by polysaccharides with different structures in biomimetic synthesis of cuprous oxide
Source: Royal Society of Chemistry journal article supplement (doi:10.1039/c8ce01010b), 2018-01-01
Supplement: c8ce01010b1.pdf [file c8ce01010b1.pdf]

As the amount of CMCH increases, the erosion of the apex corners of  $\text{Cu}_2\text{O}$  gradually disappears. The depth of erosion of the  $\{111\}$  crystal plane also gradually decreases with increasing CMCH, as shown in Fig.S1a–d. CMCH is not only adsorbed on the  $\{111\}$  plane of the  $\text{Cu}_2\text{O}$  octahedrons but is also absorbed on the corners and edges of the  $\text{Cu}_2\text{O}$  crystals. The gradient of the  $\text{Cu}^+$  concentration at the edges and corners of the crystal decreases, leading to better protection of the corners and transformation of the product, which has serious erosion at the apex corners, from octa-pods into complete octahedrons.

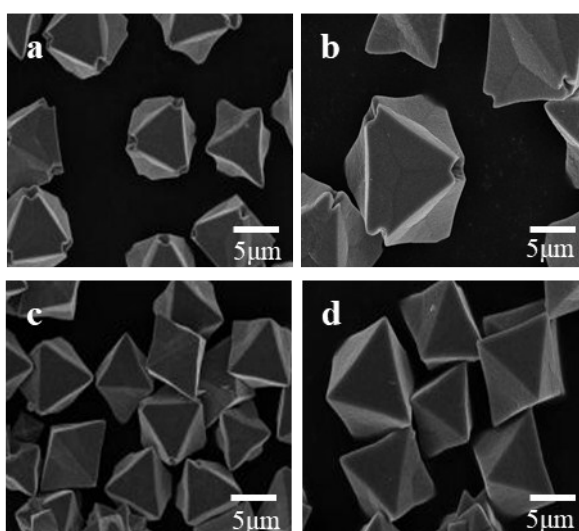

Fig. S1 SEM images of  $\text{Cu}_2\text{O}$  micron / nanocrystals synthesized with different CMCH concentrations (g/250ml): a. 0.9; b. 1.5; c. 1.9; d. 2.2.
